# Supplementary material for: Comparing the transport-limited and ξ−q models for sediment transport
Source: Copernicus journal article supplement (doi:10.5194/esurf-2021-76), 2021-11-03
Supplement: Supplementary file 1 [file esurf-2021-76-supplement.pdf]

# Supplementary Material

Jean Braun

Helmholtz Centre Potsdam, GFZ German Research Centre for Geosciences, Potsdam, Germany

## **Response to instantaneous variations in incoming sedimentary flux and relative precipitation rate.**

In the following figures, we show the response of the system to:

1. a step decrease in the incoming sedimentary flux (Figure 1);
2. an increase in relative precipitation rate (Figure 2);
3. and, a decrease in relative precipitation rate(Figure 3)

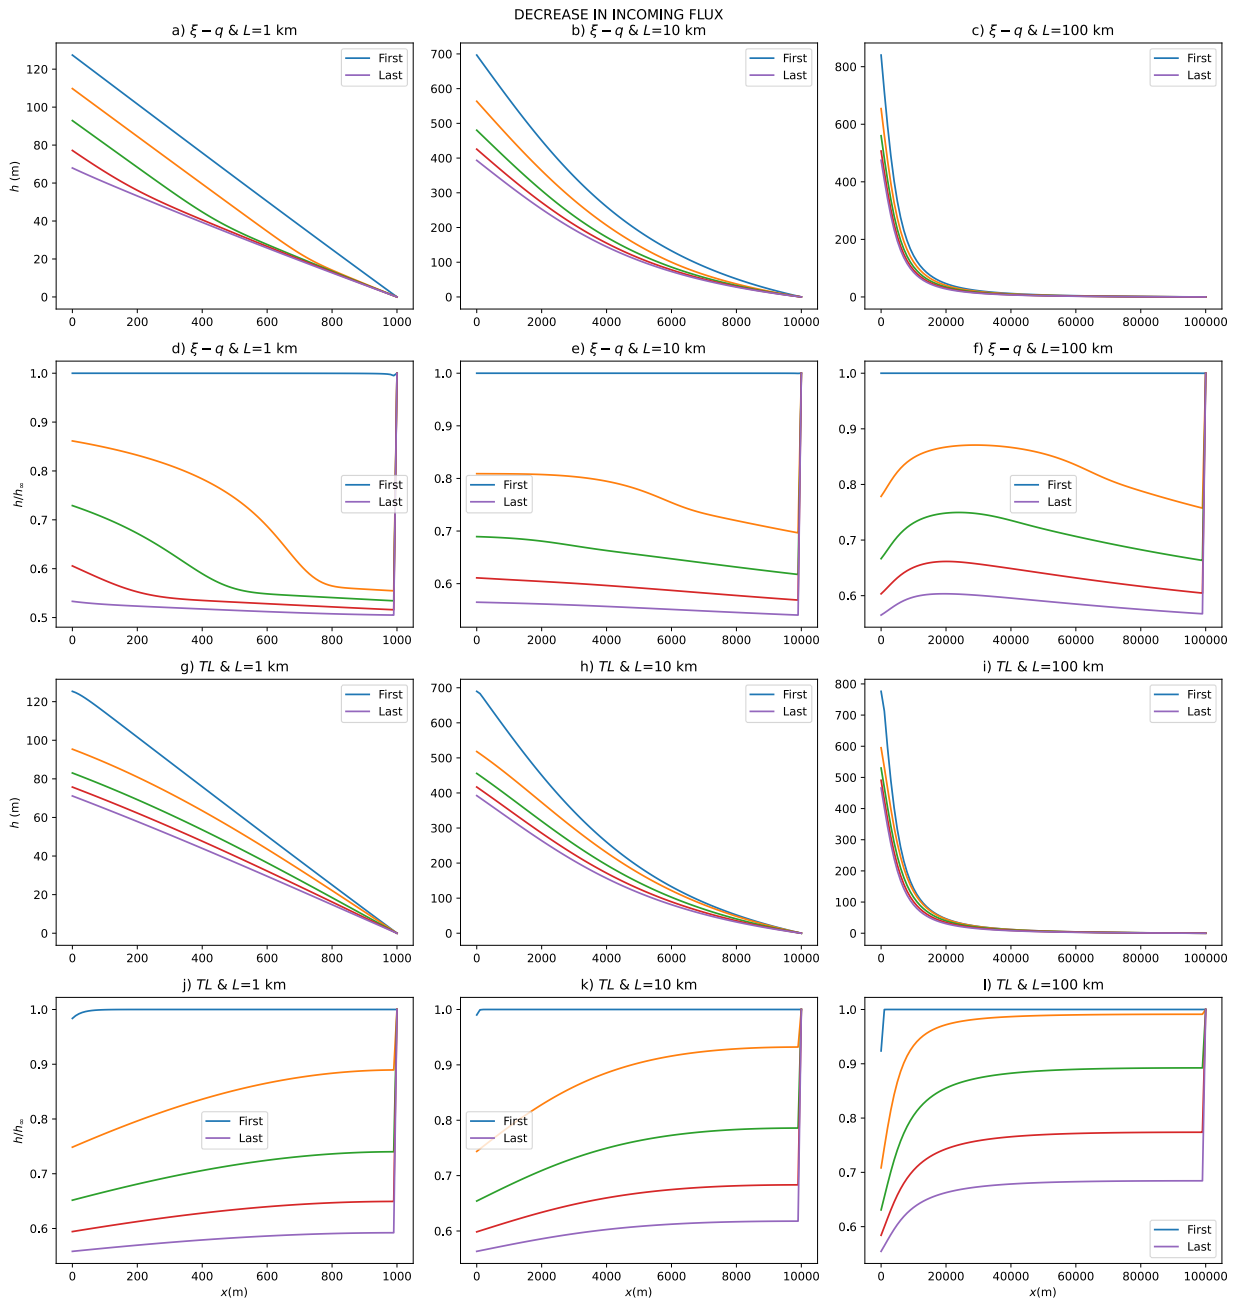

Figure 1: Same as Figure 9 but for a decrease in incoming sedimentary flux by a factor of 2.

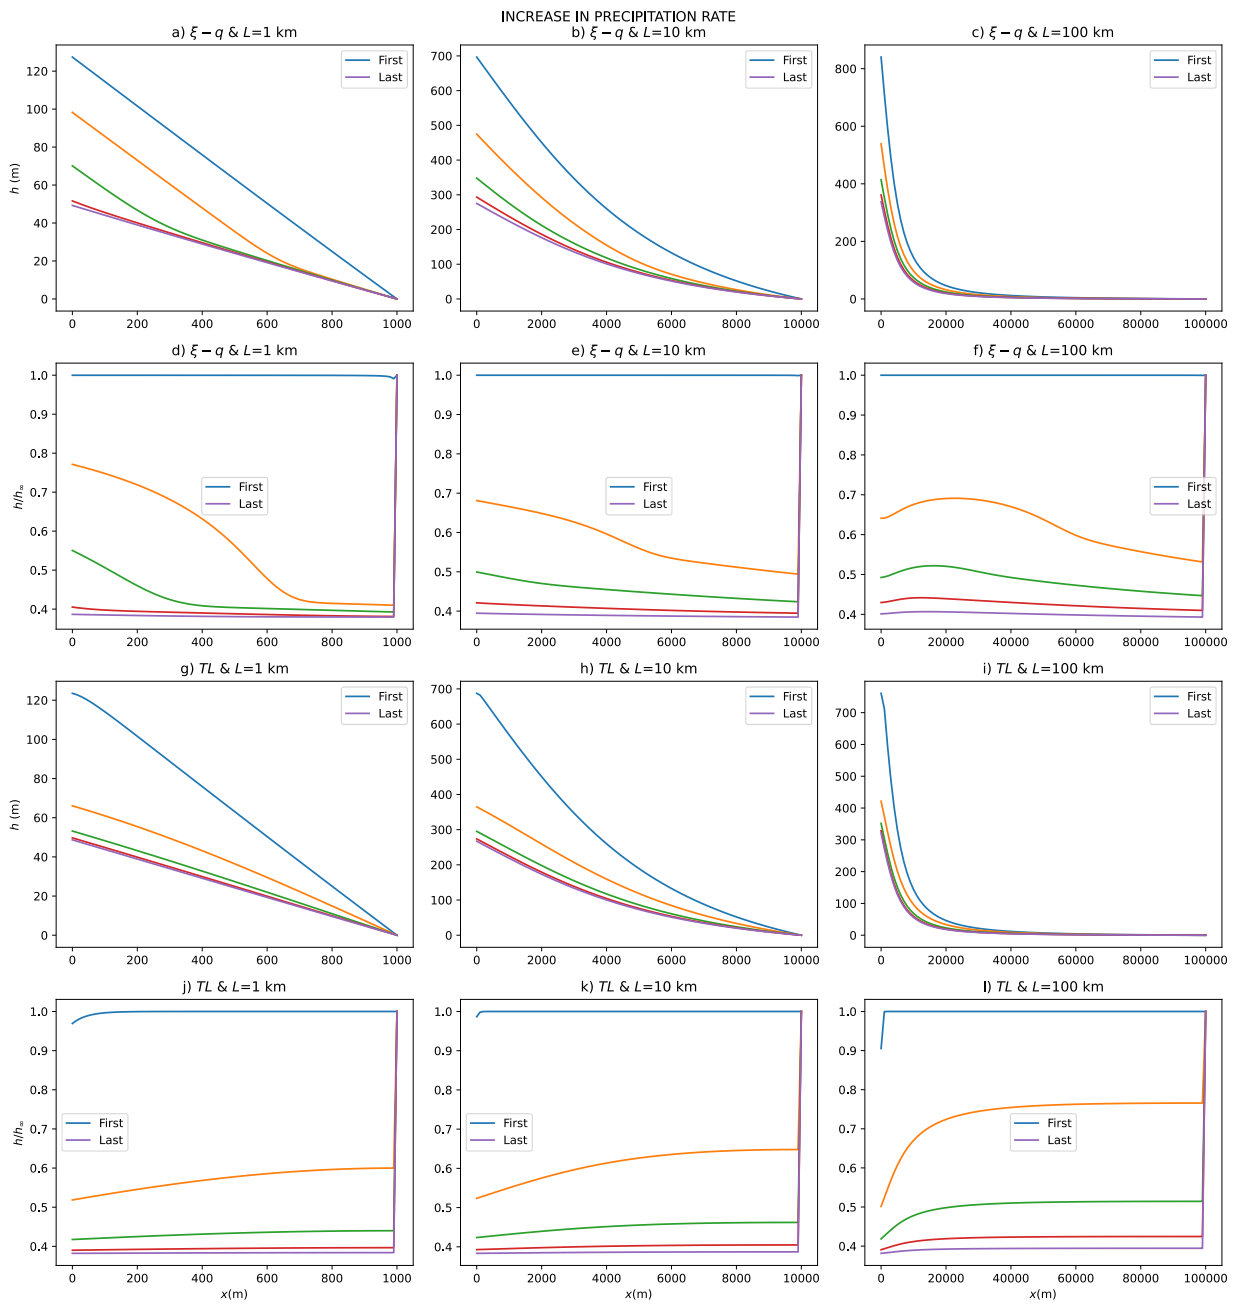

Figure 2: Same as Figure 9 but for an increase in relative precipitation rate by a factor of 2.

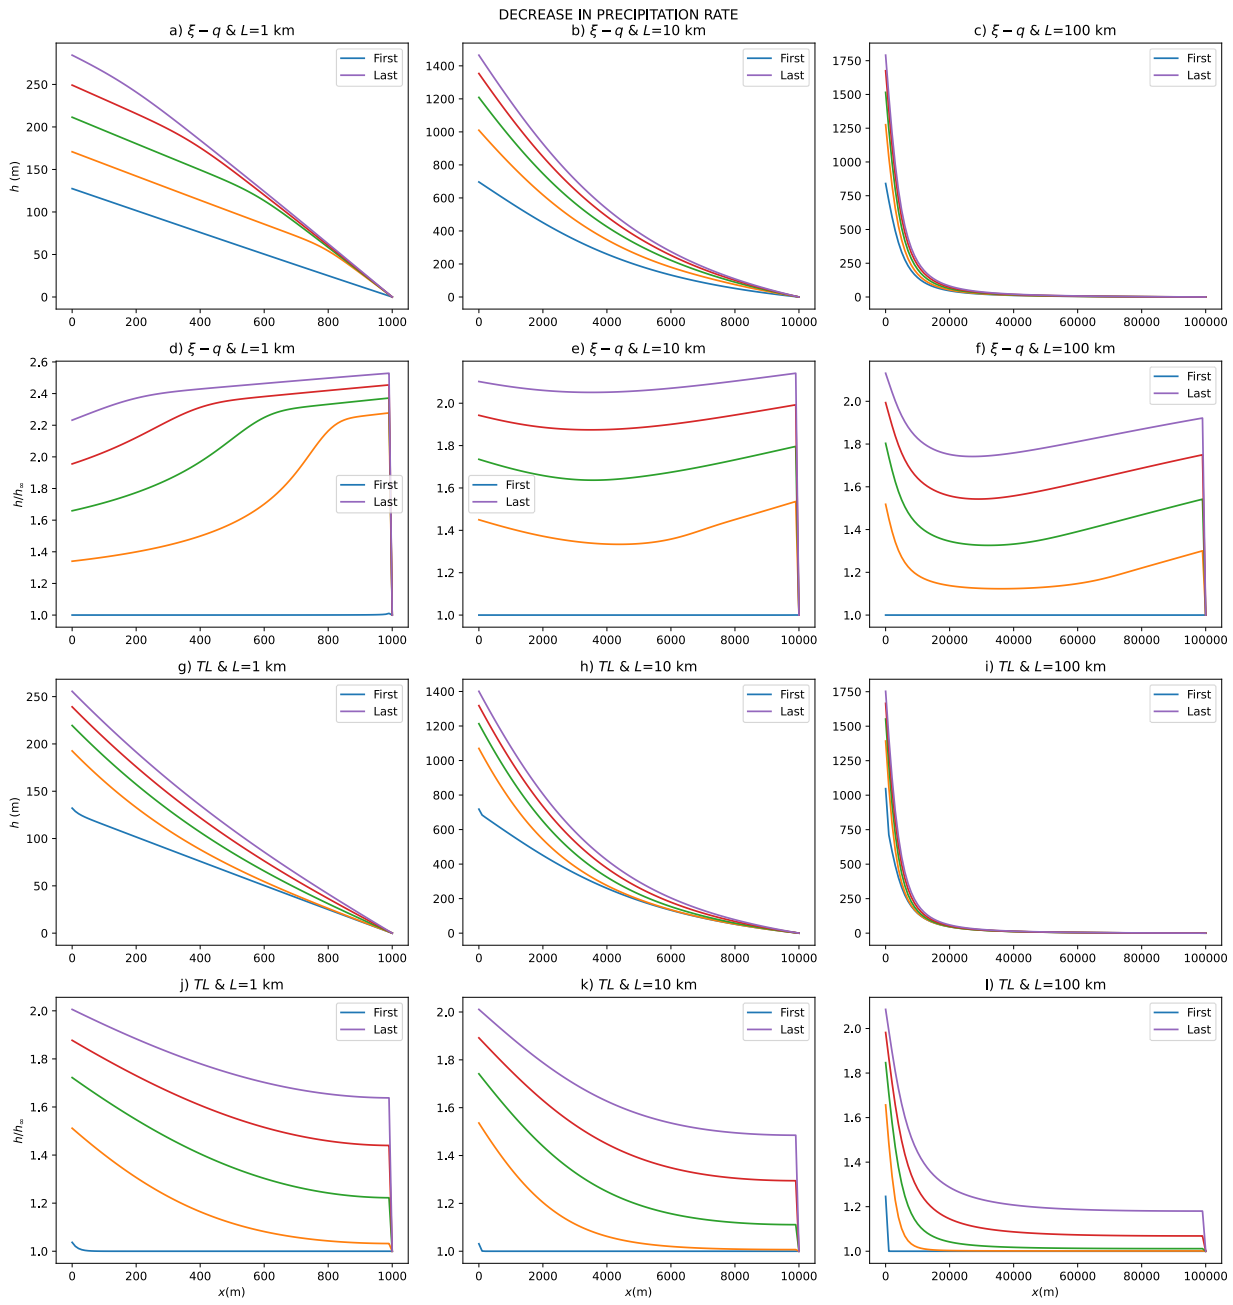

Figure 3: Same as Figure 9 but for a decrease in relative precipitation rate by a factor of 2.
